# Supplementary material
Source: Springer Nature journal article supplement (https://www.springermedizin.de/resource/supplementary/13058_2013_3370_MOESM7_ESM.pdf/9703966)

**A**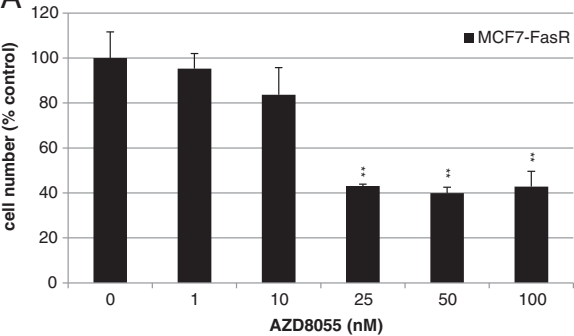**B**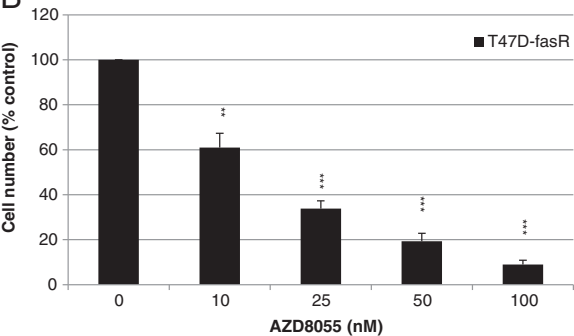

Supplement: MOESM7 [file 9703966]
